# Supplementary material
Source: publisher figshare collection journal article supplement (https://rs.figshare.com/ndownloader/files/38934335)
Supplement: Supplementary file 1 [file 38934335]

## Sheet: Saurian_muscle_architecture
Muscles	muscle group	body segment	Species	Body mass	Muscle	Fibre length	Muscle mass	Pennation (θ)	Source	Mmuscle*cos(θ)/Mbody	Mmuscle/Mbody	Lo/Mbody0.33								Mmuscle*cos(θ)/Mbody vs Lo/Mbody0.33
ISTR	deep ventral	body	Alligator	17.1	ISTR	0.0234	0.00848	45	Allen et al. 2014	0.000350659	0.000495906	0.00916911
			Melanosuchus	90	ISTR	0.054	0.02064	23.3333	Allen et al. 2014	0.000210578	0.000229333	0.0122319
			C. johnstoni	20.19	ISTR	0.0455	0.0097	0	Allen et al. 2014	0.000480436	0.000480436	0.0168778
			C. moreletti	27.7	ISTR	0.038	0.01226	15	Allen et al. 2014	0.000427518	0.000442599	0.0126989
			C. niloticus	278	ISTR	0.056	0.058	18	Allen et al. 2014	0.000198422	0.000208633	0.00874285
			Osteolaemus	7.7	ISTR	0.0186	0.003047	20	Allen et al. 2014	0.00037185	0.000395714	0.00948355
			C. niloticus	3.7	ISTR	0.019973	0.0018616	29.3333	Wiseman et al. 2021	0.000438625	0.000503135	0.0129699
			Euparkeria	0.899842	ISTR		0.000611656	21.5238	This study: 3D model	0.000632336	0.000679737
PIFE1+2+3/PIF/PIFE	deep ventral	body	Alligator	17.1	PIFE1	0.0954	0.02297	0	Allen	0.00134327	0.00134327	0.0373818
			Alligator	17.1	PIFE2	0.042625	0.0229	35.3333	Allen et al. 2014	0.00109251	0.00133918	0.0167023
			Alligator	17.1	PIFE3	0.0361429	0.01391	24.1667	Allen et al. 2014	0.000742158	0.00081345	0.0141623
			Alligator	17.1	PIFEs combined	0.058056	0.05978	19.8333	Allen et al. 2014	0.00328854	0.00349591	0.0227488
			Melanosuchus	90	PIFE1	0.1064	0.095	24	Allen et al. 2014	0.000964298	0.00105556	0.0241014
			Melanosuchus	90	PIFE2	0.088	0.0633	15.7143	Allen et al. 2014	0.000677046	0.000703333	0.0199335
			Melanosuchus	90	PIFE3	0.111333	0.0356	8	Allen et al. 2014	0.000391706	0.000395556	0.0252188
			Melanosuchus	90	PIFEs combined	0.101911	0.1939	15.9048	Allen et al. 2014	0.00207197	0.00215444	0.0230846
			C. johnstoni	20.19	PIFE1	0.06858	0.021	0	Allen et al. 2014	0.00104012	0.00104012	0.0254391
			C. johnstoni	20.19	PIFE2	0.07752	0.0144	0	Allen et al. 2014	0.000713224	0.000713224	0.0287554
			C. johnstoni	20.19	PIFE3	0.04348	0.0141	0	Allen et al. 2014	0.000698366	0.000698366	0.0161285
			C. johnstoni	20.19	PIFEs combined	0.0631933	0.0495	0	Allen et al. 2014	0.00245171	0.00245171	0.023441
			C. moreletti	27.7	PIFE1	0.0568333	0.0265	23.3333	Allen et al. 2014	0.000878438	0.000956679	0.0189926
			C. moreletti	27.7	PIFE2	0.106667	0.0187	0	Allen et al. 2014	0.00067509	0.00067509	0.035646
			C. moreletti	27.7	PIFE3	0.0778	0.01458	21.6667	Allen et al. 2014	0.000489166	0.000526354	0.0259993
			C. moreletti	27.7	PIFEs combined	0.0804333	0.05978	15	Allen et al. 2014	0.00208459	0.00215812	0.0268793
			C. niloticus	278	PIFE1	0.0975	0.045	0	Allen et al. 2014	0.000161871	0.000161871	0.0152219
			C. niloticus	278	PIFE2	0.0468	0.034	16.25	Allen et al. 2014	0.000117416	0.000122302	0.00730653
			C. niloticus	278	PIFE3	0.064	0.096	25	Allen et al. 2014	0.00031297	0.000345324	0.00999183
			C. niloticus	278	PIFEs combined	0.0694333	0.175	13.75	Allen et al. 2014	0.000611456	0.000629496	0.0108401
			Osteolaemus	7.7	PIFE1	0.05	0.006742	0	Allen et al. 2014	0.000875584	0.000875584	0.0254934
			Osteolaemus	7.7	PIFE2	0.0495	0.006164	0	Allen et al. 2014	0.000800519	0.000800519	0.0252385
			Osteolaemus	7.7	PIFE3	0.03725	0.004983	26.6667	Allen et al. 2014	0.000578308	0.000647143	0.0189926
			Osteolaemus	7.7	PIFEs combined	0.0455833	0.017889	8.88889	Allen et al. 2014	0.00229534	0.00232325	0.0232415
			C. niloticus	3.7	PIFE1	0.048637	0.0040672	6.33333	Wiseman et al. 2021	0.00109253	0.00109924	0.0315835
			C. niloticus	3.7	PIFE2	0.051685	0.0032124	10	Wiseman et al. 2021	0.000855026	0.000868216	0.0335628
			C. niloticus	3.7	PIFE3	0.04391	0.0022506	12.6667	Wiseman et al. 2021	0.000593466	0.00060827	0.0285139
			C. niloticus	3.7	PIFEs combined	0.0480773	0.0095302	9.66667	Wiseman et al. 2021	0.00253916	0.00257573	0.0312201
			V. gouldii	0.435	PIF	0.0267147	0.00195315	4.667	Dick & Clemente 2016	0.00447511	0.00449	0.03516	0.00223756
			V. komodoensis	36.667	PIF	0.105435	0.178568	2.444	Dick & Clemente 2016	0.00486557	0.00487	0.03212	0.00243279
			V. panoptes	1.609	PIF	0.0412521	0.00629119	2.278	Dick & Clemente 2016	0.00390691	0.00391	0.03526	0.00195346
			V. scalaris	0.158	PIF	0.0146975	0.00052298	2.667	Dick & Clemente 2016	0.00330641	0.00331	0.02702	0.00165321
			V. tristis	0.158	PIF	0.0160192	0.00082476	2.889	Dick & Clemente 2016	0.00521337	0.00522	0.02945	0.00260668
			V. varius	2.623	PIF	0.0409381	0.00823622	0.833	Dick & Clemente 2016	0.00313967	0.00314	0.02978	0.00156983
			G. gecko	0.09707	PIFE	0.00625	0.0001803	0	Zaaf et al 1999	0.00185742	0.00185742	0.013494
			G. gecko	0.10265	PIFE	0.00919	0.0002728	0	Zaaf et al 1999	0.00265757	0.00265757	0.019479
			E. macularius	0.057	PIFE	0.004387	5.52e-05	0	Zaaf et al 1999	0.000968421	0.000968421	0.0112909
			E. macularius	0.0517	PIFE	0.005686	6.8e-05	0	Zaaf et al 1999	0.00131528	0.00131528	0.0151131
			Euparkeria	0.899842	PIFE1		0.000633297	7.06897	This study: 3D model	0.000698437	0.000703787		0.200678
			Euparkeria	0.899842	PIFE2		0.00166277	7.06897	This study: 3D model	0.0018338	0.00184785		0.526897
			Euparkeria	0.899842	PIFE3		0.000859716	7.06897	This study: 3D model	0.000948145	0.000955408		0.272425
			Euparkeria	0.899842	PIFEs combined		0.00315578	7.06897	This study: 3D model	0.00348039	0.00350704		1
PIF1+2/PIF/PIFI	deep dorsal	body	Alligator	17.1	PIFI1	0.0708333	0.02159	0	Allen et al. 2014	0.00126257	0.00126257	0.0277555	0.00126257
			Alligator	17.1	PIFI2	0.1047	0.09338	0	Allen et al. 2014	0.00546082	0.00546082	0.0410259	0.00130111
			Alligator	17.1	PIFI combined	0.0877667	0.11497	0	Allen et al. 2014	0.00672339	0.00672339	0.0343907	0.000985636
			Melanosuchus	90	PIFI1	0.118667	0.1171	0	Allen et al. 2014	0.00130111	0.00130111	0.02688	0.000755271
			Melanosuchus	90	PIFI2	0.146125	0.327	2.5	Allen et al. 2014	0.00362988	0.00363333	0.0330997	0.000653237
			Melanosuchus	90	PIFI combined	0.132396	0.4441	1.25	Allen et al. 2014	0.00493327	0.00493444	0.0299898	0.000830519
			C. johnstoni	20.19	PIFI1	0.06078	0.0199	0	Allen et al. 2014	0.000985636	0.000985636	0.0225458	0.000870739
			C. johnstoni	20.19	PIFI2	0.12538	0.0614	0	Allen et al. 2014	0.00304111	0.00304111	0.0465086	0.00546082
			Melanosuchus	90	PIFI combined	0.09308	0.0813	0	Allen et al. 2014	0.000903333	0.000903333	0.0210842	0.00362988
			C. moreletti	27.7	PIFI1	0.076	0.020921	0	Allen et al. 2014	0.000755271	0.000755271	0.0253978	0.00304111
			C. moreletti	27.7	PIFI2	0.12	0.09769	0	Allen et al. 2014	0.00352671	0.00352671	0.0401017	0.00352671
			C. moreletti	27.7	PIFI combined	0.098	0.118611	0	Allen et al. 2014	0.00428199	0.00428199	0.0327497	0.00183667
			C. niloticus	278	PIFI1	0.186	0.1816	0	Allen et al. 2014	0.000653237	0.000653237	0.0290388	0.0031857
			C. niloticus	278	PIFI2	0.165	0.522	12	Allen et al. 2014	0.00183667	0.0018777	0.0257602	0.00672339
			C. niloticus	278	PIFI combined	0.1755	0.7036	6	Allen et al. 2014	0.00251707	0.00253094	0.0273995	0.00493327
			Osteolaemus	7.7	PIFI1	0.0981667	0.006395	0	Allen et al. 2014	0.000830519	0.000830519	0.0500521	0.000903333
			Osteolaemus	7.7	PIFI2	0.120333	0.026551	22.5	Allen et al. 2014	0.0031857	0.00344818	0.0613542	0.00428199
			Osteolaemus	7.7	PIFI combined	0.10925	0.032946	11.25	Allen et al. 2014	0.00419649	0.0042787	0.0557031	0.00251707
			C. niloticus	3.7	PIFI1	0.052607	0.0032296	4	Wiseman et al. 2021	0.000870739	0.000872865	0.0341615	0.00419649
			V. gouldii	0.435	PIF	0.0267147	0.00195315	4.667	Dick & Clemente 2016	0.00447511	0.00449	0.03516	0.00223756
			V. komodoensis	36.667	PIF	0.105435	0.178568	2.444	Dick & Clemente 2016	0.00486557	0.00487	0.03212	0.00243279
			V. panoptes	1.609	PIF	0.0412521	0.00629119	2.278	Dick & Clemente 2016	0.00390691	0.00391	0.03526	0.00195346
			V. scalaris	0.158	PIF	0.0146975	0.00052298	2.667	Dick & Clemente 2016	0.00330641	0.00331	0.02702	0.00165321
			V. tristis	0.158	PIF	0.0160192	0.00082476	2.889	Dick & Clemente 2016	0.00521337	0.00522	0.02945	0.00260668
			V. varius	2.623	PIF	0.0409381	0.00823622	0.833	Dick & Clemente 2016	0.00313967	0.00314	0.02978	0.00156983
			G. gecko	0.09707	PIFI	0.005024	0.0001924	0	Zaaf et al 1999	0.00198207	0.00198207	0.010847
			G. gecko	0.10265	PIFI	0.009262	0.0002879	0	Zaaf et al 1999	0.00280468	0.00280468	0.0196316
			E. macularius	0.057	PIFI	0.009714	5.52e-05	0	Zaaf et al 1999	0.000968421	0.000968421	0.0250011
			E. macularius	0.0517	PIFI	0.008419	5.11e-05	0	Zaaf et al 1999	0.000988395	0.000988395	0.0223773
			Euparkeria	0.899842	PIFI1		0.000564584	2.59579	This study: 3D model	0.000626782	0.000627425		0.292447
			Euparkeria	0.899842	PIFI2		0.00136597	2.59579	This study: 3D model	0.00151645	0.00151801		0.707553
			Euparkeria	0.899842	PIFIs combined		0.00193055	2.59579	This study: 3D model	0.00214323	0.00214543		1
IF/ILFEM/ILFE	deep dorsal	thigh	Alligator	17.1	IF	0.0453333	0.01639	0	Allen et al. 2014	0.00095848	0.00095848	0.0177635
			Melanosuchus	90	IF	0.071625	0.05162	23	Allen et al. 2014	0.000527961	0.000573556	0.0162242
			C. johnstoni	20.19	IF	0.02154	0.0086	23.8	Allen et al. 2014	0.00038973	0.000425953	0.00799007
			C. moreletti	27.7	IF	0.06	0.021	30	Allen et al. 2014	0.000656554	0.000758123	0.0200509	Corrected typo from original data
			C. niloticus	278	IF	0.089	0.0986	27	Allen et al. 2014	0.000316019	0.000354676	0.0138949
			Osteolaemus	7.7	IF	0.0254	0.008216	0	Allen et al. 2014	0.00106701	0.00106701	0.0129507
			C. niloticus	3.7	IF	0.033593	0.0025968	11.3333	Wiseman et al. 2021	0.000688152	0.000701838	0.0218143
			V. gouldii	0.443	ILFEM	0.0148138	0.00023922	1.444	Dick & Clemente 2016	0.000539829	0.00054	0.01938
			V. komodoensis	36.667	ILFEM	0.0798644	0.0370337	2.333	Dick & Clemente 2016	0.00100916	0.00101	0.02433
			V. panoptes	1.609	ILFEM	0.0283944	0.00107803	2.427	Dick & Clemente 2016	0.000669399	0.00067	0.02427
			V. scalaris	0.158	ILFEM	0.00998143	4.108e-05	1.835	Dick & Clemente 2016	0.000259867	0.00026	0.01835
			V. tristis	0.158	ILFEM	0.0110367	7.584e-05	2.029	Dick & Clemente 2016	0.000479699	0.00048	0.02029
			V. varius	2.623	ILFEM	0.0346833	0.00180987	2.523	Dick & Clemente 2016	0.000689331	0.00069	0.02523
			G. gecko	0.09707	ILFE	0.004398	5.85e-05	0	Zaaf et al 1999	0.000602658	0.000602658	0.00949549
			G. gecko	0.10265	ILFE	0.007955	6.23e-05	0	Zaaf et al 1999	0.000606917	0.000606917	0.0168613
			E. macularius	0.057	ILFE	0.006093	2.32e-05	0	Zaaf et al 1999	0.000407018	0.000407018	0.0156817
			E. macularius	0.0517	ILFE	0.00435	2.17e-05	0	Zaaf et al 1999	0.000419729	0.000419729	0.0115621
			Euparkeria	0.899842	IF		0.000968127	7.5132	This study: 3D model	0.00106665	0.00107589
AMB	triceps femoris	thigh	Alligator	17.1	AMB1	0.05	0.01723	28.75	Allen et al. 2014	0.000883392	0.0010076	0.0195921	0.000883392
			Alligator	17.1	AMB2	0.0255	0.00385	25.8333	Allen et al. 2014	0.000202646	0.000225146	0.00999198	0.000362667
			Alligator	17.1	AMB combined	0.03775	0.02108	27.2917	Allen et al. 2014	0.00109552	0.00123275	0.014792	0.000312036
			Melanosuchus	90	AMB1	0.0676	0.03264	0	Allen et al. 2014	0.000362667	0.000362667	0.0153125	0.000665343
			C. johnstoni	20.19	AMB1	0.06844	0.0063	0	Allen et al. 2014	0.000312036	0.000312036	0.0253872	0.000458731
			C. johnstoni	20.19	AMB2	0.0544	0.0146	0	Allen et al. 2014	0.00072313	0.00072313	0.0201792	0.00147221
			C. johnstoni	20.19	AMB combined	0.06142	0.0209	0	Allen et al. 2014	0.00103517	0.00103517	0.0227832	0.000791787
			C. moreletti	27.7	AMB1	0.0814	0.01843	0	Allen et al. 2014	0.000665343	0.000665343	0.0272023	0.000202646
			C. moreletti	27.7	AMB2	0.0366	0.00678	13.3333	Allen et al. 2014	0.000238168	0.000244765	0.012231	0.00072313
			C. moreletti	27.7	AMB combined	0.059	0.02521	6.66667	Allen et al. 2014	0.000903954	0.000910108	0.0197167	0.000238168
			C. niloticus	278	AMB1	0.112	0.1366	21	Allen et al. 2014	0.000458731	0.000491367	0.0174857	9.90934e-05
			C. niloticus	278	AMB2	0.053	0.0312	28	Allen et al. 2014	9.90934e-05	0.00011223	0.00827449	0.000162078
			C. niloticus	278	AMB combined	0.0825	0.1678	24.5	Allen et al. 2014	0.00054925	0.000603597	0.0128801	0.000288179
			Osteolaemus	7.7	AMB1	0.086	0.011336	0	Allen et al. 2014	0.00147221	0.00147221	0.0438487	0.00109552
			Osteolaemus	7.7	AMB2	0.089	0.001248	0	Allen et al. 2014	0.000162078	0.000162078	0.0453783	0.00103517
			Osteolaemus	7.7	AMB combined	0.0875	0.012584	0	Allen et al. 2014	0.00163429	0.00163429	0.0446135	0.000907372
			C. niloticus	3.7	AMB1	0.041353	0.002944	5.66667	Allen et al. 2014	0.000791787	0.000795676	0.0268535	0.000574655
			C. niloticus	3.7	AMB2	0.011603	0.00115	22	Allen et al. 2014	0.000288179	0.000310811	0.00753466	0.00162552
			C. niloticus	3.7	AMB combined	0.026478	0.004094	13.8333	Wiseman et al. 2021	0.00107439	0.00110649	0.0171941	0.00108541
			V. gouldii	0.443	AMBD	NA	0.00136001	0	Wiseman et al. 2021	0.00307	0.00307	0	0.00307
			V. komodoensis	36.667	AMBD	0.136817	0.107434	0	Wiseman et al. 2021	0.00293	0.00293	0.04168	0.00293
			V. komodoensis	36.667	AMBV	0.103597	0.130168	0	Dick & Clemente 2018	0.00355	0.00355	0.03156	0.00322
			V. komodoensis	36.667	AMB combined	0.120207	0.237602	0	Dick & Clemente 2019	0.00648	0.00648	0.03662	0.00179
			V. panoptes	1.609	AMBD	0.0413808	0.00518098	0	Dick & Clemente 2020	0.00322	0.00322	0.03537	0.00294
			V. panoptes	1.609	AMBV	0.0444928	0.00373288	0	Dick & Clemente 2021	0.00232	0.00232	0.03803	0.00278
			V. panoptes	1.609	AMB combined	0.0429368	0.00891386	0	Dick & Clemente 2022	0.00554	0.00554	0.0367	0.00355
			V. scalaris	0.158	AMBD	NA	0.00028282	0	Dick & Clemente 2023	0.00179	0.00179	0	0.00232
			V. tristis	0.158	AMBD	0.0197779	0.00046452	0	Dick & Clemente 2024	0.00294	0.00294	0.03636	0.00162
			V. tristis	0.158	AMBV	0.0208985	0.00025596	0	Dick & Clemente 2025	0.00162	0.00162	0.03842	0.00151
			V. tristis	0.158	AMB combined	0.0203382	0.00072048	0	Dick & Clemente 2026	0.00456	0.00456	0.03739
			V. varius	2.623	AMBD	0.0497636	0.00729194	0	Dick & Clemente 2027	0.00278	0.00278	0.0362
			V. varius	2.623	AMBV	0.048004	0.00396073	0	Dick & Clemente 2028	0.00151	0.00151	0.03492
			V. varius	2.623	AMB combined	0.0488838	0.0112527	0	Dick & Clemente 2029	0.00429	0.00429	0.03556
			G. gecko	0.09707	AMB	0.008255	9.66e-05	0	Zaaf et al 1999	0.000995158	0.000995158	0.0178229
			G. gecko	0.10265	AMB	0.009846	0.0001838	0	Zaaf et al 1999	0.00179055	0.00179055	0.0208695
			E. macularius	0.057	AMB	0.006143	4.82e-05	0	Zaaf et al 1999	0.000845614	0.000845614	0.0158104
			E. macularius	0.0517	AMB	0.005032	4.65e-05	0	Zaaf et al 1999	0.00089942	0.00089942	0.0133748
			Euparkeria	0.899842	AMB		0.0016418	5.86149	This study: 3D model	0.001815	0.00182454
IT1+2+3/ILTB	triceps femoris	thigh	Alligator	17.1	IT1	0.0655	0.00524	0	Allen et al. 2014	0.000306433	0.000306433	0.0256657	0.000306433
			Alligator	17.1	IT2	0.0467143	0.03411	32.6667	Allen et al. 2014	0.00167922	0.00199474	0.0183046	0.000188667
			Alligator	17.1	IT3	0.0415556	0.00763	21	Allen et al. 2014	0.000416562	0.000446199	0.0162832	0.000232789
			Alligator	17.1	ITs combined	0.0512566	0.04698	17.8889	Allen et al. 2014	0.00261454	0.00274737	0.0200845	0.000229242
			Melanosuchus	90	IT1	0.0925	0.01698	0	Allen et al. 2014	0.000188667	0.000188667	0.0209528	0.00011295
			Melanosuchus	90	IT2	0.0668333	0.09633	19.1667	Allen et al. 2014	0.001011	0.00107033	0.0151389	0.000343247
			Melanosuchus	90	IT3	0.058	0.00971	12.5	Allen et al. 2014	0.000105331	0.000107889	0.013138	0.000258838
			Melanosuchus	90	ITs combined	0.0724444	0.12302	10.5556	Allen et al. 2014	0.00134376	0.00136689	0.0164099	0.00167922
			C. johnstoni	20.19	IT1	0.06542	0.0047	0	Allen et al. 2014	0.000232789	0.000232789	0.024267	0.001011
			C. johnstoni	20.19	IT2	0.01506	0.022	16.6	Allen et al. 2014	0.00104423	0.00108965	0.00558637	0.00104423
			C. johnstoni	20.19	IT3	0.01392	0.0082	21.2	Allen et al. 2014	0.000378656	0.000406142	0.0051635	0.00196405
			C. johnstoni	20.19	ITs combined	0.0314667	0.0349	12.6	Allen et al. 2014	0.00168695	0.00172858	0.0116723	0.000748601
			C. moreletti	27.7	IT1	0.1	0.00635	0	Allen et al. 2014	0.000229242	0.000229242	0.0334181	0.00169113
			C. moreletti	27.7	IT2	0.0575	0.05547	11.25	Allen et al. 2014	0.00196405	0.00200253	0.0192154	0.00142118
			C. moreletti	27.7	IT3	0.052	0.00963	31	Allen et al. 2014	0.000297997	0.000347653	0.0173774	0.000416562
			C. moreletti	27.7	ITs combined	0.0698333	0.07145	14.0833	Allen et al. 2014	0.00250189	0.00257942	0.023337	0.000105331
			C. niloticus	278	IT1	0.151	0.0314	0	Allen et al. 2014	0.00011295	0.00011295	0.0235745	0.000378656
			C. niloticus	278	IT2	0.074	0.2454	32	Allen et al. 2014	0.000748601	0.000882734	0.0115531	0.000297997
			C. niloticus	278	IT3	0.076	0.0678	20	Allen et al. 2014	0.000229177	0.000243885	0.0118653	0.000229177
			C. niloticus	278	ITs combined	0.100333	0.3446	17.3333	Allen et al. 2014	0.00118328	0.00123957	0.0156643	0.000381818
			Osteolaemus	7.7	IT1	0.0338	0.002643	0	Allen et al. 2014	0.000343247	0.000343247	0.0172336	0.000214247
			Osteolaemus	7.7	IT2	0.0392	0.014794	28.3333	Allen et al. 2014	0.00169113	0.0019213	0.0199868	0.00261454
			Osteolaemus	7.7	IT3	0.0757143	0.00294	0	Allen et al. 2014	0.000381818	0.000381818	0.0386043	0.00134376
			Osteolaemus	7.7	ITs combined	0.0495714	0.020377	9.44444	Allen et al. 2014	0.00261049	0.00264636	0.0252749	0.00168695
			C. niloticus	3.7	IT1	0.054347	0.0009577	0	Wiseman et al. 2021	0.000258838	0.000258838	0.0352914	0.00250189
			C. niloticus	3.7	IT2	0.037413	0.0054795	16.3333	Wiseman et al. 2021	0.00142118	0.00148095	0.0242949	0.00118328
			C. niloticus	3.7	IT3	0.01633	0.0009123	29.6667	Wiseman et al. 2021	0.000214247	0.000246568	0.0106042	0.00261049
			C. niloticus	3.7	ITs combined	0.03603	0.0073495	15.3333	Wiseman et al. 2021	0.00191564	0.00198635	0.0233969	0.00191564
			V. brevicauda	0.009	ILTB	NA	4.05e-06	0	Dick & Clemente 2016	0.00045	0.00045	0
			V. caudolineatus	0.013	ILTB	NA	8.32e-06	0	Dick & Clemente 2016	0.00064	0.00064	0
			V. eremius	0.016	ILTB	NA	1.632e-05	0	Dick & Clemente 2016	0.00102	0.00102	0
			V. gouldii	0.443	ILTB	0.0258669	0.00076196	2.833	Dick & Clemente 2016	0.0017179	0.00172	0.03384
			V. komodoensis	36.667	ILTB	0.113576	0.0484004	1.667	Dick & Clemente 2016	0.00131944	0.00132	0.0346
			V. panoptes	1.381	ILTB	0.0432615	0.00227865	2.056	Dick & Clemente 2016	0.00164894	0.00165	0.03889
			V. scalaris	0.158	ILTB	0.0205884	0.00013272	1.667	Dick & Clemente 2016	0.000839644	0.00084	0.03785
			V. tristis	0.158	ILTB	0.0211487	0.00020224	0.889	Dick & Clemente 2016	0.00127985	0.00128	0.03888
			V. varius	2.623	ILTB	0.05452	0.00335744	1.5	Dick & Clemente 2016	0.00127956	0.00128	0.03966
			G. gecko	0.09707	ILTI	0.0008579	0.000205	0	Zaaf et al 1999	0.00211188	0.00211188	0.00185225
			G. gecko	0.10265	ILTI	0.001206	0.0003025	0	Zaaf et al 1999	0.00294691	0.00294691	0.00255622
			E. macularius	0.057	ILTI	0.0005354	6.21e-05	0	Zaaf et al 1999	0.00108947	0.00108947	0.00137797	Corrected typo from original data
			E. macularius	0.0517	ILTI	0.0005229	6.2e-05	0	Zaaf et al 1999	0.00119923	0.00119923	0.00138985
			Euparkeria	0.899842	IT1		0.00234066	0	This study: 3D model	0.00260119	0.00260119		0.259254
			Euparkeria	0.899842	IT2		0.00399272	9.74555	This study: 3D model	0.0043731	0.00443714		0.442238
			Euparkeria	0.899842	IT3		0.00269506	9.74555	This study: 3D model	0.00295182	0.00299504		0.298508
			Euparkeria	0.899842	ITs combined		0.00902844	6.49703	This study: 3D model	0.00996893	0.0100334		1
FMTE+FMTI/FTIB/FETI	triceps femoris	thigh	Alligator	17.1	FMTE	0.0248333	0.00879	29.1667	Allen et al. 2014	0.000448858	0.000514035	0.00973075
			Alligator	17.1	FMTI	0.0306	0.0317	31.8333	Allen et al. 2014	0.00157496	0.0018538	0.0119904
			Alligator	17.1	FMTs combied	0.0277167	0.04049	30.5	Allen et al. 2014	0.0020402	0.00236784	0.0108606
			Melanosuchus	90	FMTE	0.0341429	0.03116	24	Allen et al. 2014	0.00031629	0.000346222	0.00773392
			Melanosuchus	90	FMTI	0.0461667	0.138	35	Allen et al. 2014	0.00125603	0.00153333	0.0104575	Corrected typo from original data
			Melanosuchus	90	FMTs combied	0.0401548	0.16916	29.5	Allen et al. 2014	0.00163588	0.00187956	0.00909572
			C. johnstoni	20.19	FMTE	0.00842	0.008	0	Allen et al. 2014	0.000396236	0.000396236	0.00312332
			C. johnstoni	20.19	FMTI	0.00392	0.0375	17.6	Allen et al. 2014	0.00177041	0.00185736	0.00145409
			C. johnstoni	20.19	FMTs combied	0.00617	0.0455	8.8	Allen et al. 2014	0.00222706	0.00225359	0.00228871
			C. moreletti	27.7	FMTE	0.0385	0.01248	36	Allen et al. 2014	0.000364496	0.000450542	0.012866
			C. moreletti	27.7	FMTI	0.0668	0.0558	34	Allen et al. 2014	0.00167005	0.00201444	0.0223233
			C. moreletti	27.7	FMTs combied	0.05265	0.06828	35	Allen et al. 2014	0.0020192	0.00246498	0.0175946
			C. niloticus	278	FMTE	0.061	0.0912	28	Allen et al. 2014	0.000289658	0.000328058	0.00952347
			C. niloticus	278	FMTI	0.097	0.4152	27	Allen et al. 2014	0.00133074	0.00149353	0.0151439
			C. niloticus	278	FMTs combied	0.079	0.5064	27.5	Allen et al. 2014	0.00161576	0.00182158	0.0123337
			Osteolaemus	7.7	FMTE	0.0524	0.00321	0	Allen et al. 2014	0.000416883	0.000416883	0.0267171	Mislabeled muscles
			Osteolaemus	7.7	FMTI	0.0214	0.017338	0	Allen et al. 2014	0.00225169	0.00225169	0.0109112
			Osteolaemus	7.7	FMTs combied	0.0369	0.020548	0	Allen et al. 2014	0.00266857	0.00266857	0.0188141
			C. niloticus	3.7	FMTE	0.016323	0.0017697	27.6667	Wiseman et al. 2021	0.000423611	0.000478297	0.0105997
			C. niloticus	3.7	FMTI	0.033617	0.0066013	34.6667	Wiseman et al. 2021	0.00146741	0.00178414	0.0218299
			C. niloticus	3.7	FMTs combied	0.02497	0.008371	31.1667	Wiseman et al. 2021	0.00193589	0.00226243	0.0162148
			V. gouldi	0.443	FTIB	0.0147985	0.00048287	14	Dick & Clemente 2016	0.00105762	0.00109	0.01936
			V. komodoensis	36.667	FTIB	0.0632547	0.0385004	23.889	Dick & Clemente 2016	0.000960048	0.00105	0.01927
			V. panoptes	1.609	FTIB	0.0268735	0.00199516	16.667	Dick & Clemente 2016	0.0011879	0.00124	0.02297
			V. scalaris	0.158	FTIB	0.00980193	8.374e-05	20	Dick & Clemente 2016	0.000498037	0.00053	0.01802
			V. tristis	0.158	FTIB	0.0110421	9.164e-05	16	Dick & Clemente 2016	0.000557532	0.00058	0.0203	Corrected typo from original data
			V. varius	2.623	FTIB	0.0239058	0.00296399	24.167	Dick & Clemente 2016	0.00103096	0.00113	0.01739
			G. gecko	0.09707	FETI	0.007468	0.0001501	0	Zaaf et al 1999	0.00154631	0.00154631	0.0161238
			G. gecko	0.10265	FETI	0.01007	0.0001829	0	Zaaf et al 1999	0.00178178	0.00178178	0.0213443
			E. macularius	0.057	FETI	0.005749	9.1e-05	0	Zaaf et al 1999	0.00159649	0.00159649	0.0147963
			E. macularius	0.0517	FETI	0.005521	8.99e-05	0	Zaaf et al 1999	0.00173888	0.00173888	0.0146746
			Euparkeria	0.899842	FMTE		0.00102843	19.4233	This study: 3D model	0.00107786	0.0011429		0.332043
			Euparkeria	0.899842	FMTI		0.00206885	19.4233	This study: 3D model	0.00216828	0.00229913		0.667957
			Euparkeria	0.899842	FMTs combied		0.00309729	19.4233	This study: 3D model	0.00324614	0.00344203
ADD1+2/AFEM	adductor group	thigh	Alligator	17.1	ADD1	0.0915	0.0192	0	Allen et al. 2014	0.00112281	0.00112281	0.0358536	0.00112281
			Alligator	17.1	ADD2	0.1208	0.00754	0	Allen et al. 2014	0.000440936	0.000440936	0.0473345	0.00019294
			Alligator	17.1	ADDs combined	0.10615	0.02674	0	Allen et al. 2014	0.00156374	0.00156374	0.0415941	0.00120852
			Melanosuchus	90	ADD1	0.1196	0.0186	21	Allen et al. 2014	0.00019294	0.000206667	0.0270914	0.00101697
			Melanosuchus	90	ADD2	0.1318	0.02699	0	Allen et al. 2014	0.000299889	0.000299889	0.0298549	0.000964029
			Melanosuchus	90	ADDs combined	0.1257	0.04559	10.5	Allen et al. 2014	0.000498073	0.000506556	0.0284731	0.00109779
			C. johnstoni	20.19	ADD1	0.08474	0.0244	0	Allen et al. 2014	0.00120852	0.00120852	0.0314336	0.00112973
			C. johnstoni	20.19	ADD2	0.07696	0.0062	0	Allen et al. 2014	0.000307083	0.000307083	0.0285476	0.000440936
			C. johnstoni	20.19	ADDs combined	0.08085	0.0306	0	Allen et al. 2014	0.0015156	0.0015156	0.0299906	0.000299889
			C. moreletti	27.7	ADD1	0.1412	0.02817	0	Allen et al. 2014	0.00101697	0.00101697	0.0471863	0.000307083
			C. moreletti	27.7	ADD2	0.13	0.00537	0	Allen et al. 2014	0.000193863	0.000193863	0.0434435	0.000193863
			C. moreletti	27.7	ADDs combined	0.1356	0.03354	0	Allen et al. 2014	0.00121083	0.00121083	0.0453149	0.000178417
			C. niloticus	278	ADD1	0.151	0.268	0	Allen et al. 2014	0.000964029	0.000964029	0.0235745	0.000463117
			C. niloticus	278	ADD2	0.199	0.0496	0	Allen et al. 2014	0.000178417	0.000178417	0.0310684	0.000192297
			C. niloticus	278	ADDs combined	0.175	0.3176	0	Allen et al. 2014	0.00114245	0.00114245	0.0273214	0.00156374
			Osteolaemus	7.7	ADD1	0.0812	0.008453	0	Allen et al. 2014	0.00109779	0.00109779	0.0414013	0.000498073
			Osteolaemus	7.7	ADD2	0.05	0.003566	0	Allen et al. 2014	0.000463117	0.000463117	0.0254934	0.0015156
			Osteolaemus	7.7	ADDs combined	0.0656	0.012019	0	Allen et al. 2014	0.00156091	0.00156091	0.0334474	0.00121083
			C. niloticus	3.7	ADD1	0.062753	0.004192	4.33333	Wiseman et al. 2021	0.00112973	0.00113297	0.04075	0.00114245
			C. niloticus	3.7	ADD2	0.070457	0.0007115	0	Wiseman et al. 2021	0.000192297	0.000192297	0.0457528	0.00156091
			C. niloticus	3.7	ADDs combined	0.066605	0.0049035	2.16667	Wiseman et al. 2021	0.00132432	0.00132527	0.0432514	0.00132432
			V. gouldii	0.443	AFEM	NA	0.00049173	0	Dick & Clemente 2016	0.00111	0.00111	0
			V. komodoensis	36.667	AFEM	0.127921	0.0971676	0	Dick & Clemente 2016	0.00265	0.00265	0.03897
			V. panoptes	1.609	AFEM	0.044095	0.00328236	0	Dick & Clemente 2016	0.00204	0.00204	0.03769
			V. scalaris	0.158	AFEM	NA	0.00011534	0	Dick & Clemente 2016	0.00073	0.00073	0
			V. tristis	0.158	AFEM	0.0195603	0.00022278	0	Dick & Clemente 2016	0.00141	0.00141	0.03596
			V. varius	2.623	AFEM	0.0453646	0.00566568	0	Dick & Clemente 2016	0.00216	0.00216	0.033
			G. gecko	0.09707	ADD	0.008512	4.46e-05	0	Zaaf et al 1999	0.000459462	0.000459462	0.0183778
			G. gecko	0.10265	ADD	0.01398	6.88e-05	0	Zaaf et al 1999	0.000670239	0.000670239	0.0296318
			E. macularius	0.057	ADD	0.007537	2.16e-05	0	Zaaf et al 1999	0.000378947	0.000378947	0.0193981
			E. macularius	0.0517	ADD	0.006559	1.8e-05	0	Zaaf et al 1999	0.000348162	0.000348162	0.0174335
			Euparkeria	0.899842	ADD1		0.00135595	1.22581	This study: 3D model	0.00150653	0.00150688		0.445617
			Euparkeria	0.899842	ADD2		0.00168691	1.22581	This study: 3D model	0.00187425	0.00187467		0.554383
			Euparkeria	0.899842	ADDs combied		0.00304286	1.22581	This study: 3D model	0.00338078	0.00338155
PIT	adductor group	thigh	Alligator	17.1	PIT	0.1038	0.00975	15	Allen et al. 2014	0.000550747	0.000570175	0.0406732
			Melanosuchus	90	PIT	0.1294	0.05911	20	Allen et al. 2014	0.000617169	0.000656778	0.0293112
			C. johnstoni	20.19	PIT	0.08964	0.0088	0	Allen et al. 2014	0.000435859	0.000435859	0.0332512
			C. moreletti	27.7	PIT	0.127	0.01372	0	Allen et al. 2014	0.000495307	0.000495307	0.042441
			C. niloticus	278	PIT	0.2283	0.1276	10	Allen et al. 2014	0.00045202	0.000458993	0.0356427
			Osteolaemus	7.7	PIT	0.0885	0.005264	0	Allen et al. 2014	0.000683636	0.000683636	0.0451233
			C. niloticus	3.7	PIT	0.054885	0.001592	4.33333	Wiseman et al. 2021	0.00042904	0.00043027	0.0356408
			V. brevicauda	0.009	PIT	NA	9.99e-06	0	Dick & Clemente 2016	0.00111	0.00111	0
			V. caudolineatus	0.013	PIT	NA	2.964e-05	0	Dick & Clemente 2016	0.00228	0.00228	0
			V. eremius	0.016	PIT	NA	5.2e-05	0	Dick & Clemente 2016	0.00325	0.00325	0
			V. gouldii	0.443	PIT	NA	0.00116509	0	Dick & Clemente 2016	0.00263	0.00263	0
			V. komodoensis	36.667	PIT	0.225774	0.198368	0	Dick & Clemente 2016	0.00541	0.00541	0.06878
			V. panoptes	1.381	PIT	0.0660659	0.00522018	0	Dick & Clemente 2016	0.00378	0.00378	0.05939
			V. scalaris	0.158	PIT	NA	0.00039342	0	Dick & Clemente 2016	0.00249	0.00249	0
			V. tristis	0.158	PIT	0.0311627	0.00072206	0	Dick & Clemente 2016	0.00457	0.00457	0.05729
			V. varius	2.623	PIT	0.0746317	0.0123543	0	Dick & Clemente 2016	0.00471	0.00471	0.05429
			G. gecko	0.09707	PIT	0.010056	0.0004238	29	Zaaf et al 1999	0.00381852	0.00436592	0.0217114
			G. gecko	0.10265	PIT	0.016175	0.0006446	31	Zaaf et al 1999	0.00538266	0.00627959	0.0342843
			E. macularius	0.057	PIT	0.009708	0.0001117	25	Zaaf et al 1999	0.00177605	0.00195965	0.0249857
			E. macularius	0.0517	PIT	0.008978	0.0001217	20	Zaaf et al 1999	0.002212	0.00235397	0.0238631
			Euparkeria	0.899842	PIT		0.00188545	7.71667	This study: 3D model	0.00207634	0.00209531
ILFB/ILFIB/ILFI	flexor cruris	thigh	Alligator	17.1	ILFB	0.1086	0.0089	0	Allen et al. 2014	0.000520468	0.000520468	0.0425541
			Melanosuchus	90	ILFB	0.1348	0.04557	0	Allen et al. 2014	0.000506333	0.000506333	0.0305344
			C. johnstoni	20.19	ILFB	0.09768	0.0067	0	Allen et al. 2014	0.000331847	0.000331847	0.0362335
			C. moreletti	27.7	ILFB	0.154	0.01304	0	Allen et al. 2014	0.000470758	0.000470758	0.0514639
			C. niloticus	278	ILFB	0.226	0.0874	0	Allen et al. 2014	0.000314388	0.000314388	0.0352837
			Osteolaemus	7.7	ILFB	0.0184	0.00466	0	Allen et al. 2014	0.000605195	0.000605195	0.00938158
			C. niloticus	3.7	ILFB	0.074133	0.0018032	0	Wiseman et al. 2021	0.000487351	0.000487351	0.0481399
			V. brevicauda	0.009	ILFIB	NA	4.68e-06	0	Dick & Clemente 2016	0.00052	0.00052	0
			V. caudolineatus	0.013	ILFIB	NA	1.95e-05	0	Dick & Clemente 2016	0.0015	0.0015	0
			V. eremius	0.016	ILFIB	NA	1.2e-05	0	Dick & Clemente 2016	0.00075	0.00075	0
			V. gouldii	0.443	ILFIB	0.0322953	0.00073538	1.66725	Dick & Clemente 2016	0.0016593	0.00166	0.04225
			V. komodoensis	36.667	ILFIB	0.130908	0.0858008	0.222	Dick & Clemente 2016	0.00233998	0.00234	0.03988
			V. panoptes	1.381	ILFIB	0.0509483	0.00592449	0.611	Dick & Clemente 2016	0.00428976	0.00429	0.0458
			V. scalaris	0.158	ILFIB	0.0264358	0.00017696	1.333	Dick & Clemente 2016	0.0011197	0.00112	0.0486
			V. tristis	0.158	ILFIB	0.0253153	0.00028756	0.444	Dick & Clemente 2016	0.00181995	0.00182	0.04654
			V. varius	2.623	ILFIB	0.0571457	0.00414434	0.333	Dick & Clemente 2016	0.00157997	0.00158	0.04157
			G. gecko	0.09707	ILFI	0.01685	0.000144	0	Zaaf et al 1999	0.00148347	0.00148347	0.0363799
			G. gecko	0.10265	ILFI	0.013012	0.0001582	0	Zaaf et al 1999	0.00154116	0.00154116	0.0275801
			E. macularius	0.057	ILFI	0.009299	2.9e-05	9	Zaaf et al 1999	0.000502508	0.000508772	0.023933
			E. macularius	0.0517	ILFI	0.010507	2.97e-05	0	Zaaf et al 1999	0.000574468	0.000574468	0.0279272
			Euparkeria	0.899842	ILFB		0.00363642	0.680513	This study: 3D model	0.0040409	0.00404118
											#DIV/0!
											#DIV/0!
FTE/FTEP	flexor cruris	thigh	Alligator	17.1	FTE	0.103875	0.03766	0	Allen et al. 2014	0.00220234	0.00220234	0.0407026
			Melanosuchus	90	FTE	0.100571	0.1371	0	Allen et al. 2014	0.00152333	0.00152333	0.0227811
			C. johnstoni	20.19	FTE	0.10546	0.0398	0	Allen et al. 2014	0.00197127	0.00197127	0.0391195
			C. moreletti	27.7	FTE	0.1526	0.04163	0	Allen et al. 2014	0.00150289	0.00150289	0.050996
			C. niloticus	278	FTE	0.206	0.2998	0	Allen et al. 2014	0.00107842	0.00107842	0.0321612
			Osteolaemus	7.7	FTE	0.074	0.011608	15	Allen et al. 2014	0.00145616	0.00150753	0.0377303
			C. niloticus	3.7	FTE	0.075063	0.0059403	0	Wiseman et al. 2021	0.00160549	0.00160549	0.0487438
			V. gouldii	0.443	FTE	NA	0.00076196	0	Dick & Clemente 2016	0.00172	0.00172	0
			V. komodoensis	36.667	FTE	0.145187	0.0953342	0	Dick & Clemente 2016	0.0026	0.0026	0.04423
			V. panoptes	1.609	FTE	0.0525186	0.00390987	0	Dick & Clemente 2016	0.00243	0.00243	0.04489
			V. scalaris	0.158	FTE	NA	0.00044398	0	Dick & Clemente 2016	0.00281	0.00281	0
			V. tristis	0.158	FTE	0.0228077	0.00031284	0	Dick & Clemente 2016	0.00198	0.00198	0.04193
			V. varius	2.623	FTE	0.0574756	0.00653127	0	Dick & Clemente 2016	0.00249	0.00249	0.04181
			G. gecko	0.09707	FTEP	0.01232	0.0002413	0	Zaaf et al 1999	0.00248583	0.00248583	0.0265994
			G. gecko	0.10265	FTEP	0.0202	0.0004081	0	Zaaf et al 1999	0.00397565	0.00397565	0.0428157
			E. macularius	0.057	FTEP	0.010705	6.52e-05	0	Zaaf et al 1999	0.00114386	0.00114386	0.0275517
			E. macularius	0.0517	FTEP	0.010749	6.019e-05	0	Zaaf et al 1999	0.00116422	0.00116422	0.0285704
			Euparkeria	0.899842	FTE		0.00316551	0.882353	This study: 3D model	0.00351743	0.00351785
FTI 1/FTI (S)/FTIA	flexor cruris	thigh	Alligator	17.1	FTI 1	0.0874	0.00291	0	Allen et al. 2014	0.000170175	0.000170175	0.034247
			Melanosuchus	90	FTI 1	0.115	0.04088	22	Allen et al. 2014	0.000421148	0.000454222	0.0260494
			C. johnstoni	20.19	FTI 1	0.0974	0.0056	0	Allen et al. 2014	0.000277365	0.000277365	0.0361297
			C. moreletti	27.7	FTI 1	0.16	0.00929	0	Allen et al. 2014	0.000335379	0.000335379	0.053469
			C. niloticus	278	FTI 1	0.2305	0.045	0	Allen et al. 2014	0.000161871	0.000161871	0.0359862
			Osteolaemus	7.7	FTI 1	0.09225	0.003148	0	Allen et al. 2014	0.000408831	0.000408831	0.0470354
			C. niloticus	3.7	FTI 1	0.0663725	0.000788	6	Wiseman et al. 2021	0.000211806	0.000212973	0.0431004
			V. gouldii	0.443	FTI (S)	0.0456263	0.00065564	0.889	Dick & Clemente 2016	0.00147982	0.00148	0.05969	0.00074
			V. komodoensis	36.667	FTI (S)	0.150833	0.0894675	1.222	Dick & Clemente 2016	0.00243945	0.00244	0.04595	0.00122
			V. panoptes	1.609	FTI (S)	0.063516	0.00403859	0.944	Dick & Clemente 2016	0.00250966	0.00251	0.05429	0.001255
			V. scalaris	0.158	FTI (S)	0.022514	0.00017064	0.667	Dick & Clemente 2016	0.00107993	0.00108	0.04139	0.00054
			V. tristis	0.158	FTI (S)	0.0221387	0.0002528	0.222	Dick & Clemente 2016	0.00159999	0.0016	0.0407	0.0008
			V. varius	2.623	FTI (S)	0.0669472	0.00878705	0.417	Dick & Clemente 2016	0.00334991	0.00335	0.0487	0.001675
			G. gecko	0.09707	FTIA	0.00971	4.49e-05	15	Zaaf et al 1999	0.000446792	0.000462553	0.0209643
			G. gecko	0.10265	FTIA	0.010949	7.88e-05	13	Zaaf et al 1999	0.000747982	0.000767657	0.0232074
			E. macularius	0.057	FTIA	0.007782	6.82e-05	15	Zaaf et al 1999	0.00115572	0.00119649	0.0200287
			E. macularius	0.0517	FTIA	0.007871	6.19e-05	9	Zaaf et al 1999	0.00118255	0.00119729	0.0209208
			Euparkeria	0.899842	FTI 1		0.00219314	4.96241	This study: 3D model	0.00242811	0.00243725
FTI 2/FTI (S) ?/FTEA	flexor cruris	thigh	Alligator	17.1	FTI 2	0.1485	0.02263	0.152	Allen et al. 2014	0.00132339	0.00132339	0.0581886
			Melanosuchus	90	FTI 2	0.1604	0.12549	0	Allen et al. 2014	0.00139433	0.00139433	0.0363333
			C. johnstoni	20.19	FTI 2	0.1265	0.0307	0	Allen et al. 2014	0.00152055	0.00152055	0.0469241
			C. moreletti	27.7	FTI 2	0.1928	0.0361	0	Allen et al. 2014	0.00130325	0.00130325	0.0644301
			C. niloticus	278	FTI 2	0.290111	0.1712	0	Allen et al. 2014	0.000615827	0.000615827	0.0452928
			Osteolaemus	7.7	FTI 2	0.05	0.005943	0	Allen et al. 2014	0.000771818	0.000771818	0.0254934
			C. niloticus	3.7	FTI 2	0.0883525	0.0031763	0	Wiseman et al. 2021	0.000858459	0.000858459	0.0573736
			V. gouldii	0.443	FTI (S)	0.0456263	0.00065564	0.889	Dick & Clemente 2016	0.00147982	0.00148	0.05969	0.000739911
			V. komodoensis	36.667	FTI (S)	0.150833	0.0894675	1.222	Dick & Clemente 2016	0.00243945	0.00244	0.04595	0.00121972
			V. panoptes	1.609	FTI (S)	0.063516	0.00403859	0.944	Dick & Clemente 2016	0.00250966	0.00251	0.05429	0.00125483
			V. scalaris	0.158	FTI (S)	0.022514	0.00017064	0.667	Dick & Clemente 2016	0.00107993	0.00108	0.04139	0.000539963
			V. tristis	0.158	FTI (S)	0.0221387	0.0002528	0.222	Dick & Clemente 2016	0.00159999	0.0016	0.0407	0.000799994
			V. varius	2.623	FTI (S)	0.0669472	0.00878705	0.417	Dick & Clemente 2016	0.00334991	0.00335	0.0487	0.00167496
			G. gecko	0.09707	FTEA	0.006357	8.4e-05	12	Zaaf et al 1999	0.000846445	0.000865355	0.0137251
			G. gecko	0.10265	FTEA	0.009122	0.0001389	20	Zaaf et al 1999	0.00127154	0.00135314	0.0193349
			Euparkeria	0.899842	FTI 2		0.00237148	2.4342	This study: 3D model	0.00263306	0.00263544
FTI 3/FTI (D)/ FTI A	flexor cruris	thigh	Alligator	17.1	FTI3	0.060375	0.01166	23.6	Allen et al. 2014	0.000624841	0.000681871	0.0236575
			Melanosuchus	90	FTI3	0.0484	0.04496	28	Allen et al. 2014	0.000441081	0.000499556	0.0109634
			C. johnstoni	20.19	FTI3	0.10078	0.015	0	Allen et al. 2014	0.000742942	0.000742942	0.0373834
			C. moreletti	27.7	FTI3	0.115	0.00298	0	Allen et al. 2014	0.000107581	0.000107581	0.0384308
			C. niloticus	278	FTI3	0.15	0.0926	0	Allen et al. 2014	0.000333094	0.000333094	0.0234184
			Osteolaemus	7.7	FTI3	0.0137143	0.005642	28.3333	Allen et al. 2014	0.000644948	0.000732727	0.00699248
			C. niloticus	3.7	FTI3	0.039703	0.001432	12	Wiseman et al. 2021	0.00037857	0.000387027	0.025782
			V. gouldii	0.443	FTI (D)	0.0381964	0.00036769	0.556	Dick & Clemente 2016	0.000829961	0.00083	0.04997
			V. komodoensis	36.667	FTI (D)	0.130448	0.0249336	0.444	Dick & Clemente 2016	0.00067998	0.00068	0.03974
			V. panoptes	1.609	FTI (D)	0.0613165	0.00173772	0.444	Dick & Clemente 2016	0.00107997	0.00108	0.05241
			V. scalaris	0.158	FTI (D)	0.0221604	0.00015958	0.333	Dick & Clemente 2016	0.00100998	0.00101	0.04074
			V. tristis	0.158	FTI (D)	0.0235584	0.0001659	0.111	Dick & Clemente 2016	0.00105	0.00105	0.04331
			V. varius	2.623	FTI (D)	0.0688305	0.00359351	0.25	Dick & Clemente 2016	0.00136999	0.00137	0.05007
			G. gecko	0.09707	FTIP	0.009399	4.91e-05	21	Zaaf et al 1999	0.000472224	0.000505821	0.0202929
			G. gecko	0.10265	FTIP	0.008593	8.54e-05	22	Zaaf et al 1999	0.000771374	0.000831953	0.0182136
			Euparkeria	0.899842	FTI 3		0.00132589	9.13809	This study: 3D model	0.00145477	0.00147347
CFL/CFEML	retractor	tail	Alligator	17.1	CFL	0.190818	0.31869	0	Allen et al. 2014	0.0186368	0.0186368	0.0747706
			Melanosuchus	90	CFL	0.194438	0.934	40.625	Allen et al. 2014	0.0078766	0.0103778	0.0440433
			C. johnstoni	20.19	CFL	0.104285	0.3163	1.76923	Allen et al. 2014	0.0156587	0.0156662	0.0386835
			C. moreletti	27.7	CFL	0.161625	0.32953	35	Allen et al. 2014	0.00974495	0.0118964	0.054012
			C. niloticus	278	CFL	0.24	2.348	23	Allen et al. 2014	0.00777462	0.00844604	0.0374694
			Osteolaemus	7.7	CFL	0.037	0.10361	26.6667	Allen et al. 2014	0.0120246	0.0134558	0.0188651
			C. niloticus	3.7	CFL	0.1553	0.0616848	0	Wiseman et al. 2021	0.0166716	0.0166716	0.100847
			V. brevicauda	0.009	CFEML	NA	9.009e-05	0	Dick & Clemente 2016	0.01001	0.01001	0
			V. caudolineatus	0.013	CFEML	NA	0.00010764	0	Dick & Clemente 2016	0.00828	0.00828	0
			V. eremius	0.016	CFEML	NA	0.00015136	0	Dick & Clemente 2016	0.00946	0.00946	0
			V. gouldii	0.443	CFEML	0.0459549	0.00960867	20.446	Dick & Clemente 2016	0.0203236	0.02169	0.06012
			V. komodoensis	36.667	CFEML	0.104582	0.424237	24.556	Dick & Clemente 2016	0.0105236	0.01157	0.03186
			V. panoptes	1.381	CFEML	0.049758	0.0237256	20.889	Dick & Clemente 2016	0.0160508	0.01718	0.04473
			V. Scalaris	0.158	CFEML	0.0295853	0.00189284	22.333	Dick & Clemente 2016	0.0110814	0.01198	0.05439
			V. tristis	0.158	CFEML	0.0282309	0.0046294	21.778	Dick & Clemente 2016	0.0272088	0.0293	0.0519
			V. varius	2.623	CFEML	0.0510421	0.0308727	21.833	Dick & Clemente 2016	0.0109258	0.01177	0.03713
			G. gecko	0.09707	CFL	0.008981	0.0005234	0	Zaaf et al 1999	0.00539199	0.00539199	0.0193904
			G. gecko	0.10265	CFL	0.009984	0.0006471	0	Zaaf et al 1999	0.00630395	0.00630395	0.021162
			E. macularius	0.057	CFL	0.006838	9.97e-05	0	Zaaf et al 1999	0.00174912	0.00174912	0.0175991
			E. macularius	0.0517	CFL	0.00808	8.99e-05	0	Zaaf et al 1999	0.00173888	0.00173888	0.0214763
			Euparkeria	0.899842	CFL		0.0233923	12.9448	This study: 3D model	0.0253354	0.025996
CFB/CFEMB	retractor	tail	Alligator	17.1	CFB	0.06425	0.02231	0	Allen et al. 2014	0.00130468	0.00130468	0.0251759
			Melanosuchus	90	CFB	0.0898333	0.0788	14.1667	Allen et al. 2014	0.000848928	0.000875556	0.0203487
			C. johnstoni	20.19	CFB	0.0128	0.0238	16	Allen et al. 2014	0.00113314	0.0011788	0.00474805
			C. moreletti	27.7	CFB	0.01	0.02594	0	Allen et al. 2014	0.000936462	0.000936462	0.00334181
			C. niloticus	278	CFB	0.053	0.0666	25	Allen et al. 2014	0.000217123	0.000239568	0.00827449
			Osteolaemus	7.7	CFB	0.0642	0.011905	0	Allen et al. 2014	0.0015461	0.0015461	0.0327335
			C. niloticus	3.7	CFB	0.04625	0.0039877	0	Wiseman et al. 2021	0.00107776	0.00107776	0.0300334
			V. komodoensis	40	CFEMB	0.0973247	0.0724	0	Dick & Clemente 2016	0.00181	0.00181	0.02881
			V. panoptes	2.437	CFEMB	0.0297996	0.00601939	0	Dick & Clemente 2016	0.00247	0.00247	0.02221
			V. tristis	0.285	CFEMB	0.0137456	0.00041895	0	Dick & Clemente 2016	0.00147	0.00147	0.0208
			V. varius	4.82	CFEMB	0.0414044	0.018557	0	Dick & Clemente 2016	0.00385	0.00385	0.02464
			G. gecko	0.09707	CFB	0.004982	0.0001185	0	Zaaf et al 1999	0.00122077	0.00122077	0.0107564
			G. gecko	0.10265	CFB	0.006594	0.0001405	0	Zaaf et al 1999	0.00136873	0.00136873	0.0139766
			E. macularius	0.057	CFB	0.003915	1.89e-05	0	Zaaf et al 1999	0.000331579	0.000331579	0.0100761
			E. macularius	0.0517	CFB	0.004571	1.63e-05	0	Zaaf et al 1999	0.00031528	0.00031528	0.0121495
			Euparkeria	0.899842	CFB		0.00389844	3.67778	This study: 3D model	0.00432344	0.00433237
GL/GM/GAST	ankle flexor	crus	Alligator	17.1	GL	0.0225714	0.02638	27.5	Allen et al. 2014	0.00136838	0.00154269	0.00884444
			Alligator	17.1	GM	0.0664	0.01227	17	Allen et al. 2014	0.000686191	0.000717544	0.0260183
			Alligator	17.1	Gast combined	0.0444857	0.03865	22.25	Allen et al. 2014	0.00209194	0.00226023	0.0174314
			Melanosuchus	90	GL	0.0341111	0.11355	39.2308	Allen et al. 2014	0.000977293	0.00126167	0.00772673
			Melanosuchus	90	GM	0.075	0.0297	22.5	Allen et al. 2014	0.00030488	0.00033	0.0169887
			Melanosuchus	90	Gast combined	0.0545556	0.14325	30.8654	Allen et al. 2014	0.00136625	0.00159167	0.0123577
			C. johnstoni	20.19	GL	0.02556	0.024	36.8	Allen et al. 2014	0.000951835	0.00118871	0.00948126
			C. johnstoni	20.19	GM	0.07504	0.0096	0	Allen et al. 2014	0.000475483	0.000475483	0.0278354
			C. johnstoni	20.19	Gast combined	0.0503	0.0336	18.4	Allen et al. 2014	0.00157911	0.00166419	0.0186583
			C. moreletti	27.7	GL	0.0443333	0.03075	28	Allen et al. 2014	0.000980167	0.00111011	0.0148154
			C. moreletti	27.7	GM	0.08775	0.00833	0	Allen et al. 2014	0.000300722	0.000300722	0.0293244
			C. moreletti	27.7	Gast combined	0.0660417	0.03908	14	Allen et al. 2014	0.00136892	0.00141083	0.0220699
			C. niloticus	278	GL	0.109	0.3266	39	Allen et al. 2014	0.000913007	0.00117482	0.0170173
			C. niloticus	278	GM	0.171	0.0727	0	Allen et al. 2014	0.000261511	0.000261511	0.0266969
			C. niloticus	278	Gast combined	0.14	0.3993	19.5	Allen et al. 2014	0.00135395	0.00143633	0.0218571
			Osteolaemus	7.7	GL	0.0314	0.009707	15	Allen et al. 2014	0.00121769	0.00126065	0.0160099
			Osteolaemus	7.7	GM	0.016	0.002842	0	Allen et al. 2014	0.000369091	0.000369091	0.00815789
			Osteolaemus	7.7	Gast combined	0.0237	0.012549	7.5	Allen et al. 2014	0.0016158	0.00162974	0.0120839
			C. niloticus	3.7	GL	0.022083	0.0041344	25.6667	Wiseman et al. 2021	0.00100715	0.00111741	0.0143401
			C. niloticus	3.7	GM	0.0485	0.0010616	14.6667	Wiseman et al. 2021	0.00027757	0.000286919	0.0314945
			C. niloticus	3.7	Gast combined	0.0352915	0.005196	20.1667	Wiseman et al. 2021	0.00131823	0.00140432	0.0229173
			V. brevicauda	0.009	GAST	NA	6.309e-05	0	Dick & Clemente 2016	0.00701	0.00701	0
			V. caudolineatus	0.013	GAST	NA	1.56e-05	0	Dick & Clemente 2016	0.0012	0.0012	0
			V. eremius	0.016	GAST	NA	2.848e-05	0	Dick & Clemente 2016	0.00178	0.00178	0
			V. gouldii	0.443	GAST	0.0224806	0.00128913	20.667	Dick & Clemente 2016	0.00272273	0.00291	0.02941
			V. komodoensis	36.667	GAST	0.0601363	0.0942342	25.667	Dick & Clemente 2016	0.00231641	0.00257	0.01832
			V. panoptes	1.381	GAST	0.0381667	0.00393585	23.278	Dick & Clemente 2016	0.002618	0.00285	0.03431
			V. scalaris	0.158	GAST	0.0108789	0.00022436	20.333	Dick & Clemente 2016	0.00133152	0.00142	0.02
			V. tristis	0.158	GAST	0.0163619	0.0004819	22.333	Dick & Clemente 2016	0.00282122	0.00305	0.03008
			V. varius	2.623	GAST	0.0412406	0.00744932	26	Dick & Clemente 2016	0.00255258	0.00284	0.03
			G. gecko	0.09707	GAST	0.003913	8.37e-05	26	Zaaf et al 1999	0.000774998	0.000862264	0.00844835
			G. gecko	0.10265	GAST	0.005803	0.0001502	21	Zaaf et al 1999	0.00136604	0.00146322	0.0123
			E. macularius	0.057	GAST	0.004979	3.72e-05	15	Zaaf et al 1999	0.000630394	0.000652632	0.0128146
			E. macularius	0.0517	GAST	0.003493	3.01e-05	14	Zaaf et al 1999	0.000564911	0.000582205	0.00928425
			Euparkeria	0.899842	GL		0.00223474	18.0095	This study: 3D model	0.00236181	0.00248348		0.64284
			Euparkeria	0.899842	GM		0.00124162	18.0095	This study: 3D model	0.00131221	0.00137982		0.35716
			Euparkeria	0.899842	Gast combied		0.00347636	18.0095	This study: 3D model	0.00367402	0.0038633
FB/PBREV/PERB	ankle flexor	crus	Alligator	17.1	FB	0.0154286	0.00233	33	Allen et al. 2014	0.000114275	0.000136257	0.00604557
			Melanosuchus	90	FB	0.0298	0.00975	27	Allen et al. 2014	9.65257e-05	0.000108333	0.00675019
			C. johnstoni	20.19	FB	0.0509833	0.0015	0	Allen et al. 2014	7.42942e-05	7.42942e-05	0.0189118
			C. moreletti	27.7	FB	0.0292	0.00339	12	Allen et al. 2014	0.000119708	0.000122383	0.00975808
			C. niloticus	278	FB	0.0640625	0.0152	0	Allen et al. 2014	5.46763e-05	5.46763e-05	0.0100016
			Osteolaemus	7.7	FB	0.02625	0.001125	20	Allen et al. 2014	0.000137293	0.000146104	0.013384
			C. niloticus	3.7	FB	0.0277925	0.000598	12	Wiseman et al. 2021	0.00015809	0.000161622	0.0180477
			V. komodoensis	40	PBREV	0.0725966	0.0364	24	Dick & Clemente 2016	0.000831326	0.00091	0.02149
			V. panoptes	24.37	PBREV	0.09449	0.0175464	22	Dick & Clemente 2016	0.000667572	0.00072	0.03294
			V. tristis	0.265	PBREV	0.0193227	0.00023055	10.667	Dick & Clemente 2016	0.000854966	0.00087	0.02995
			V. varius	4.82	PBREV	0.0514194	0.0044826	19.667	Dick & Clemente 2016	0.000875748	0.00093	0.0306
			G. gecko	0.09707	PERB	0.003708	2.51e-05	22	Zaaf et al 1999	0.000239748	0.000258576	0.00800574
			G. gecko	0.10265	PERB	0.006226	4.22e-05	16	Zaaf et al 1999	0.00039518	0.000411106	0.0131966
			Euparkeria	0.899842	FB		0.000362578	16.7949	This study: 3D model	0.000385748	0.000402936
FL/PLONG/PERL	ankle flexor	crus	Alligator	17.1	FL	0.0215	0.00506	26	Allen et al. 2014	0.000265959	0.000295906	0.00842461
			Melanosuchus	90	FL	0.0164	0.0027	42	Allen et al. 2014	2.22943e-05	3e-05	0.00371487
			C. johnstoni	20.19	FL	0.043	0.0032	0	Allen et al. 2014	0.000158494	0.000158494	0.0159505
			C. moreletti	27.7	FL	0.0328	0.00741	26.25	Allen et al. 2014	0.000239922	0.000267509	0.0109611
			C. niloticus	278	FL	0.0382	0.0392	41.5	Allen et al. 2014	0.000105608	0.000141007	0.00596388
			Osteolaemus	7.7	FL	0.042	0.001644	30	Allen et al. 2014	0.000184902	0.000213506	0.0214145
			C. niloticus	3.7	FL	0.017017	0.0009842	22.3333	Wiseman et al. 2021	0.000246047	0.000266	0.0110504
			V. gouldii	0.443	PLONG	0.020325	0.00049173	11.667	Dick & Clemente 2016	0.00108707	0.00111	0.02659
			V. komodoensis	36.667	PLONG	0.0757612	0.0319003	17.556	Dick & Clemente 2016	0.000829478	0.00087	0.02308
			V. panoptes	1.381	PLONG	0.0335947	0.00196102	15.333	Dick & Clemente 2016	0.00136946	0.00142	0.0302
			V. scalaris	0.158	PLONG	0.0133213	0.00012008	12.333	Dick & Clemente 2016	0.000742461	0.00076	0.02449
			V. tristis	0.158	PLONG	0.0160791	0.00019276	13.556	Dick & Clemente 2016	0.00118601	0.00122	0.02956
			V. varius	2.623	PLONG	0.0313016	0.00267546	14.917	Dick & Clemente 2016	0.000985626	0.00102	0.02277
			G. gecko	0.09707	PERL	0.004792	3.53e-05	17	Zaaf et al 1999	0.000347765	0.000363655	0.0103461
			G. gecko	0.10265	PERL	0.006835	7.16e-05	10	Zaaf et al 1999	0.000686919	0.000697516	0.0144874
			E. macularius	0.057	PERL	0.003667	3.09e-05	16	Zaaf et al 1999	0.000521105	0.000542105	0.00943783
			E. macularius	0.0517	PERL	0.004588	2.57e-05	8	Zaaf et al 1999	0.000492261	0.000497099	0.0121947
			Euparkeria	0.899842	FL		0.00106969	19.085	This study: 3D model	0.00112342	0.00118876
PP/TP	ankle flexor	crus	Alligator	17.1	PP	0.0135	0.00194	18.75	Allen et al. 2014	0.00010743	0.00011345	0.00528987
			Melanosuchus	90	PP	0.027	0.00683	0	Allen et al. 2014	7.58889e-05	7.58889e-05	0.00611595
			C. johnstoni	20.19	PP	0.008	0.0023	33	Allen et al. 2014	9.55395e-05	0.000113918	0.00296753
			C. moreletti	27.7	PP	0.0248571	0.0041	23	Allen et al. 2014	0.000136248	0.000148014	0.00830678
			C. niloticus	278	PP	0.0135	0.0236	34	Allen et al. 2014	7.03787e-05	8.48921e-05	0.00210765
			Osteolaemus	7.7	PP	0.0184	0.001698	25	Allen et al. 2014	0.000199859	0.000220519	0.00938158
			C. niloticus	3.7	PP	0.0104833	0.0003409	22.3333	Wiseman et al. 2021	8.5224e-05	9.21351e-05	0.00680758
			Euparkeria	0.899842	PP		0.000475265	22.2976	This study: 3D model	0.000488671	0.000528165
FDL	digital flexor	crus	Alligator	17.1	FDL	0.021125	0.01112	34.4	Allen et al. 2014	0.000536565	0.000650292	0.00827767
			Melanosuchus	90	FDL	0.03	0.03238	20.8333	Allen et al. 2014	0.000336255	0.000359778	0.0067955
			C. johnstoni	20.19	FDL	0.00908	0.0137	17	Allen et al. 2014	0.000648904	0.000678554	0.00336815
			C. moreletti	27.7	FDL	0.031	0.01395	25	Allen et al. 2014	0.000456426	0.00050361	0.0103596
			C. niloticus	278	FDL	0.071	0.1088	21	Allen et al. 2014	0.000365372	0.000391367	0.0110847
			Osteolaemus	7.7	FDL	0.0246	0.003097	15	Allen et al. 2014	0.000388503	0.000402208	0.0125428
			C. niloticus	3.7	FDL	0.016723	0.0027473	25.3333	Wiseman et al. 2021	0.000671109	0.000742514	0.0108594
			V. komodoensis	40	FDL	0.103541	0.0544	0	Dick & Clemente 2016	0.00136	0.00136	0.03065
			V. panoptes	2.437	FDL	0.0416068	0.0021933	0	Dick & Clemente 2016	0.0009	0.0009	0.03101
			V. tristis	0.265	FDL	0.0164646	6.095e-05	0	Dick & Clemente 2016	0.00023	0.00023	0.02552
			V. varius	4.82	FDL	0.0604094	0.0053984	0	Dick & Clemente 2016	0.00112	0.00112	0.03595
			G. gecko	0.09707	FDL	0.007466	8.52e-05	18	Zaaf et al 1999	0.000834759	0.000877717	0.0161194
			G. gecko	0.10265	FDL	0.007412	0.0001	13	Zaaf et al 1999	0.000949216	0.000974184	0.0157104
			E. macularius	0.057	FDL	0.004664	4.4e-05	0	Zaaf et al 1999	0.00077193	0.00077193	0.0120038
			E. macularius	0.0517	FDL	0.004743	4.05e-05	0	Zaaf et al 1999	0.000783366	0.000783366	0.0126067
			Euparkeria	0.899842	FDL		0.00102513	12.6378	This study: 3D model	0.00111163	0.00113923
FHL	digital flexor	crus	Alligator	17.1	FHL	0.019	0.00321	21.6	Allen et al. 2014	0.000174537	0.000187719	0.007445
			Melanosuchus	90	FHL	0.0236	0.0129	26	Allen et al. 2014	0.000128827	0.000143333	0.00534579
			C. johnstoni	20.19	FHL	0.0093	0.0083	40.4	Allen et al. 2014	0.000313064	0.000411095	0.00344975
			C. moreletti	27.7	FHL	0.032	0.00389	18.3333	Allen et al. 2014	0.000133305	0.000140433	0.0106938
			C. niloticus	278	FHL	0.06	0.0248	21	Allen et al. 2014	8.32834e-05	8.92086e-05	0.00936734
			Osteolaemus	7.7	FHL	0.0492	0.001014	0	Allen et al. 2014	0.000131688	0.000131688	0.0250855
			C. niloticus	3.7	FHL	0.0229	0.0006273	12.3333	Wiseman et al. 2021	0.000165628	0.000169541	0.0148706
			Euparkeria	0.899842	FHL		0.000289168	19.9524	This study: 3D model	0.000302065	0.000321354
TC/EDL	ankle extensor	crus	Alligator	17.1	EDL	0.0461429	0.01438	21.6667	Allen et al. 2014	0.000781521	0.000840936	0.0180807
			Melanosuchus	90	EDL	0.0514	0.04131	27	Allen et al. 2014	0.000408972	0.000459	0.011643
			C. johnstoni	20.19	EDL	0.05973	0.0087	0	Allen et al. 2014	0.000430906	0.000430906	0.0221563
			C. moreletti	27.7	EDL	0.0758	0.01359	13.3333	Allen et al. 2014	0.000477389	0.000490614	0.0253309
			C. niloticus	278	EDL	0.164	0.1008	35	Allen et al. 2014	0.000297016	0.00036259	0.0256041
			Osteolaemus	7.7	EDL	0.103	0.004912	0	Allen et al. 2014	0.000637922	0.000637922	0.0525164
			C. niloticus	3.7	EDL	0.057473	0.0023382	18.3333	Wiseman et al. 2021	0.00059987	0.000631946	0.0373213
			V. brevicauda	0.009	EDL	NA	1.89e-06	0	Dick & Clemente 2016	0.00021	0.00021	0
			V. caudolineatus	0.013	EDL	NA	6.76e-07	0	Dick & Clemente 2016	5.2e-05	5.2e-05	0
			V. eremius	0.016	EDL	NA	1.424e-06	0	Dick & Clemente 2016	8.9e-05	8.9e-05	0
			V. gouldii	0.443	EDL	0.0342904	0.00058919	0.667	Dick & Clemente 2016	0.00132991	0.00133	0.04486
			V. komodoensis	36.667	EDL	0.121027	0.0319003	0.222	Dick & Clemente 2016	0.000869993	0.00087	0.03687
			V. panoptes	1.381	EDL	0.050025	0.00187816	0.389	Dick & Clemente 2016	0.00135997	0.00136	0.04497
			V. scalaris	0.158	EDL	0.0221876	0.0001264	0	Dick & Clemente 2016	0.0008	0.0008	0.04079
			V. tristis	0.158	EDL	0.0249291	0.00022752	0.111	Dick & Clemente 2016	0.00144	0.00144	0.04583
			V. varius	2.623	EDL	0.0553036	0.0028853	0.25	Dick & Clemente 2016	0.00109999	0.0011	0.04023
			G. gecko	0.09707	EDL	0.010474	6.95e-05	0	Zaaf et al 1999	0.000715978	0.000715978	0.0226139
			G. gecko	0.10265	EDL	0.0109	6.51e-05	0	Zaaf et al 1999	0.000634194	0.000634194	0.0231035
			E. macularius	0.057	EDL	0.006037	1.07e-05	0	Zaaf et al 1999	0.000187719	0.000187719	0.0155375
			E. macularius	0.0517	EDL	0.0064	1.57e-05	0	Zaaf et al 1999	0.000303675	0.000303675	0.0170109
			Euparkeria	0.899842	TC		0.00126573	5.84862	This study: 3D model	0.00139929	0.00140662
EDL/TA/TIBA/TIAN
	ankle extensor	crus	Alligator	17.1	TA	0.0723333	0.00965	0	Allen et al. 2014	0.000564327	0.000564327	0.0283433
			Melanosuchus	90	TA	0.0891667	0.03663	0	Allen et al. 2014	0.000407	0.000407	0.0201977
			C. johnstoni	20.19	TA	0.0683	0.0091	0	Allen et al. 2014	0.000450718	0.000450718	0.0253353
			C. moreletti	27.7	TA	0.0742	0.010057	0	Allen et al. 2014	0.000363069	0.000363069	0.0247962
			C. niloticus	278	TA	0.16	0.0972	0	Allen et al. 2014	0.00034964	0.00034964	0.0249796
			Osteolaemus	7.7	TA	0.0695	0.003961	0	Allen et al. 2014	0.000514416	0.000514416	0.0354359
			C. niloticus	3.7	TA	0.055593	0.0020158	0	Wiseman et al. 2021	0.000544811	0.000544811	0.0361005
			V. komodoensis	40	TIBA	0.115465	0.0232	16	Dick & Clemente 2016	0.000557532	0.00058	0.03418
			V. panoptes	2.437	TIBA	0.0469602	0.00143783	4.333	Dick & Clemente 2016	0.000588314	0.00059	0.035
			V. tristis	0.265	TIBA	0.0257163	0.0004505	16.333	Dick & Clemente 2016	0.00163139	0.0017	0.03986
			V. varius	4.82	TIBA	0.0572335	0.0034222	9.667	Dick & Clemente 2016	0.000699918	0.00071	0.03406
			G. gecko	0.09707	TIAN	0.005743	4.88e-05	30	Zaaf et al 1999	0.000435377	0.00050273	0.0123994
			G. gecko	0.10265	TIAN	0.006085	7.82e-05	25	Zaaf et al 1999	0.000690436	0.000761812	0.0128977
			E. macularius	0.057	TIAN	0.007571	1.43e-05	16	Zaaf et al 1999	0.000241159	0.000250877	0.0194856
			E. macularius	0.0517	TIAN	0.006717	1.15e-05	12	Zaaf et al 1999	0.000217576	0.000222437	0.0178535
			Euparkeria	0.899842	EDL		0.000957906	8.6222	This study: 3D model	0.0010525	0.00106453
EDB	digital extensor	pes	Alligator	17.1	EDB	0.0178333	0.00412	19	Allen et al. 2014	0.000227809	0.000240936	0.00698785
			Melanosuchus	90	EDB	0.01975	0.04867	20	Allen et al. 2014	0.000508165	0.000540778	0.0044737
			C. johnstoni	20.19	EDB	0.022	0.005	0	Allen et al. 2014	0.000247647	0.000247647	0.00816071
			C. moreletti	27.7	EDB	0.0315	0.01755	0	Allen et al. 2014	0.000633574	0.000633574	0.0105267
			C. niloticus	278	EDB	0.045	0.0878	25	Allen et al. 2014	0.000286237	0.000315827	0.00702551
			Osteolaemus	7.7	EDB	0.015	0.00272	0	Allen et al. 2014	0.000353247	0.000353247	0.00764803
			C. niloticus	3.7	EDB	0.0172	0.00391	0	Wiseman et al. 2021	0.00105676	0.00105676	0.00253904
			Euparkeria	0.899842	EDB		0.00036398	9.14286	This study: 3D model	0.000399354	0.000404493
AHD	digital extensor	pes	Alligator	17.1	AHD	0.0226	0.00181	19	Allen et al. 2014	0.000100081	0.000105848	0.00885564
			Melanosuchus	90	AHD	0.038	0.0049	0	Allen et al. 2014	5.44444e-05	5.44444e-05	0.00860763
			C. johnstoni	20.19	AHD	0.0256333	0.0016	0	Allen et al. 2014	7.92472e-05	7.92472e-05	0.00950846
			C. moreletti	27.7	AHD	0.043	0.00257	0	Allen et al. 2014	9.27798e-05	9.27798e-05	0.0143698
			Osteolaemus	7.7	AHD	0.0325	0.000688	0	Allen et al. 2014	8.93506e-05	8.93506e-05	0.0165707
			C. niloticus	3.7	AHD	0.064	0.0006717	0	Wiseman et al. 2021	0.000181541	0.000181541	0.0415598
			Euparkeria	0.899842	AHD		1.92628e-05	3.16667	This study: 3D model	2.13742e-05	2.14069e-05
FDB/FDBS+FDBP	digital flexor	pes	Alligator	17.1	FDB	0.0095	0.01122	43	Allen et al. 2014	0.000479871	0.00065614	0.0037225
			Melanosuchus	90	FDB	0.0152917	0.08097	28	Allen et al. 2014	0.000794359	0.000899667	0.00346382
			C. moreletti	27.7	FDB	0.0193077	0.03912	31	Allen et al. 2014	0.00121056	0.00141227	0.00645226
			C. niloticus	278	FDB	0.024	0.1426	24	Allen et al. 2014	0.000468603	0.00051295	0.00374694
			Osteolaemus	7.7	FDB	0.00875	0.009422	24	Allen et al. 2014	0.00111785	0.00122364	0.00446135
			C. niloticus	3.7	FDB	0.03681	0.003	30	Wiseman et al. 2021	0.000702183	0.000810811	0.0239034
			Euparkeria	0.899842	FDBS		0.000256879	30	This study: 3D model	0.000247226	0.000285472
			Euparkeria	0.899842	FDBP		0.000179236	30	This study: 3D model	0.0001725	0.000199186
			Euparkeria	0.899842	FDB		0.000436115	30	This study: 3D model	0.000419726	0.000484658

## Sheet: Flexor_tibialis_homologies
muscle homologies across saurians	This study	Romer 1922	Romer 1923	Romer 1942	Snyder 1954	Hutchinson 2001	Hutchinson 2001	Dick & Clemente 2016	Haines, 1934	Zaaf et al. 1999	Zaaf et al. 1999
	Euparkeria	Iguana	Crocodilus	Iguana	Basiliscus	Lepidosauria	Crocodylia	Varanus	Varanus	Gecko	Eublepharis
flexort tibialis externus	FTE	FTE	FTE	FTE	FTE	FTE	FTE	FTE	FTE	FTEP	FTEP
flexor tibialis internus 1	FTI 1	FTI I	FTI 1	FTI I	FTIM	FTI1	FTI1	FTI S	FT inferior	FTIA	FTIA
flexor tibialis internus 2	FTI 2	FTI I	FTI 2	PIT III	FTIP	PIT3	FTI2	(FTI S?)	F intercapitalis posterior	FTEA	(FTIA?)
flexor tibialis internus 3	FTI 3	FTI II	FTI 3	FTI II	FTIL	FTI2	FTI3	FTI D	FT genicularis	FTIP	-
flexor tibialis internus 4	undivided (?)	FTI II	FTI 4	FTI II	-	undivided (?)	FTI4	-	-	-	-
puboischiotibialis	PIT	PIT	PIT	PIT II	PIT	PIT2	PIT	PIT	PIT	PIT	PIT
pubotibialis	absent (?)	PT	absent	PT	PT	PT	-	PTIB	adductor tibialis	PUTI	PUTI
FTI 1, FTI 2, PIT and PT insert on medial tibia
FTE, FTI 3 and FTI 4 (where present) insert on posterolateral tibia
